# Supplementary material for: The role of plantigrady and heel-strike in the mechanics and energetics of human walking with implications for the evolution of the human foot
Source: Oxford University Press journal article supplement (doi:10.1242/jeb.138610), 2016-11-30
Supplement: jeb138610supp.pdf [file jeb138610supp.pdf]

## Supplementary information

---

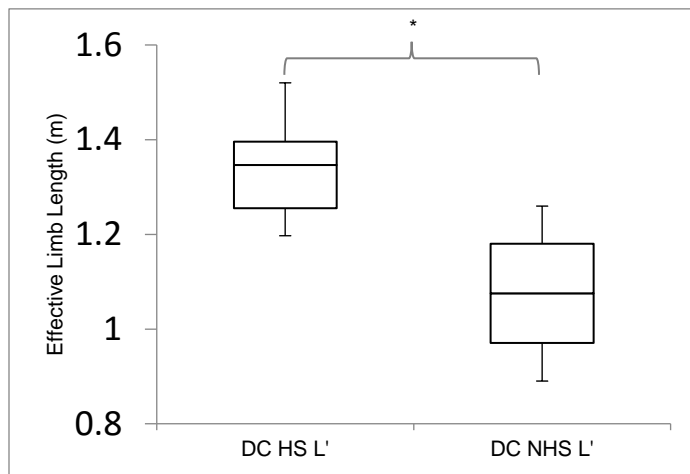

**Supplemental Fig. 1. Dynamically calculated limb length.** DC  $L'$  was significantly shorter in NHS trials (Supplemental Fig. 1;  $-0.247 \pm 0.109\text{m}$ ,  $p < 0.0001$ ) when compared to HS trials at preferred walking speeds.

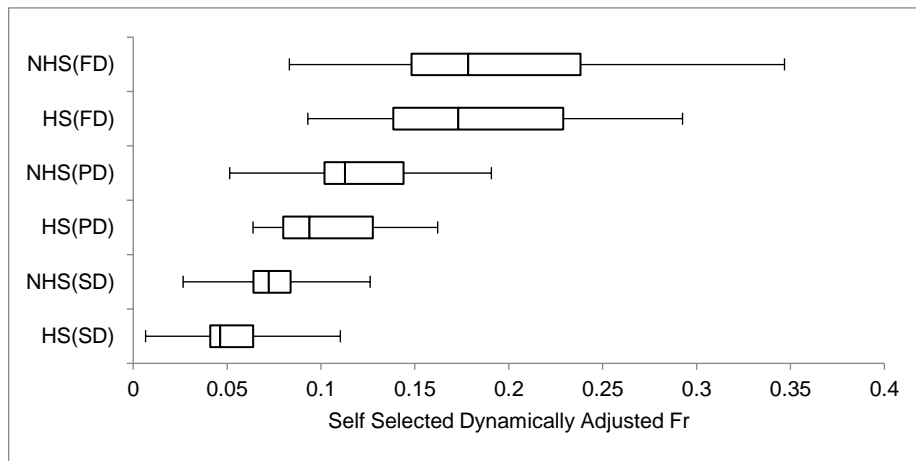

**Supplemental Fig. 2. DC Froude number and foot strike.** There was no significant difference between HS and NHS Fr' when calculated dynamically (Supplemental Fig. 2; slow  $p = 0.10$ , preferred  $p = 0.48$ , fast  $p = 0.87$ ).

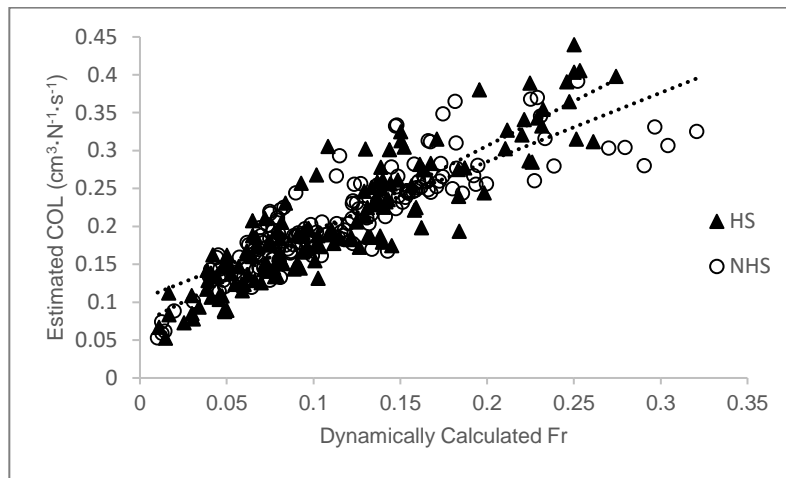

**Supplemental Fig. 3.**  $\dot{E}_{COL}$  accounting for the effects DC on  $L$ . The estimated cost of locomotion (COL) was not significantly different between HS and NHS footfalls after calculating limb length dynamically. (Supplemental Fig. 3;  $X^2(1) = 0.19$ ,  $p = 0.6660$ ).

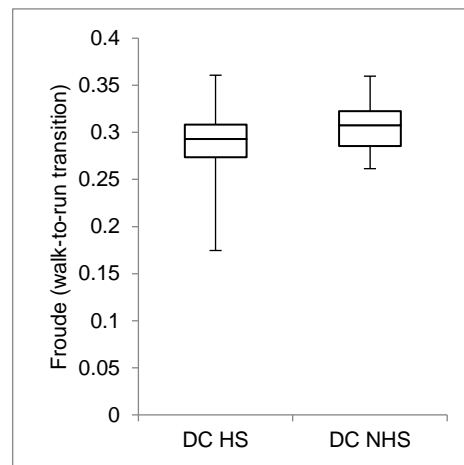

**Supplemental Fig. 4. DC WTR speed.** The dynamically calculated dimensionless Fr' walk-to-run transition speeds were not statistically different between HS and NHS (Supplemental Fig. 4;  $p = 0.34$ ).
